# Supplementary material for: The Mechanisms of BDNF Promoting the Proliferation of Porcine Follicular Granulosa Cells: Role of miR-127 and Involvement of the MAPK-ERK1/2 Pathway
Source: MDPI journal article supplement (doi:10.3390/ani13061115), 2023-03-21
Supplement: s1 [file s1]

Table S1. Primers used for qRT-PCR

| Primers         | Sequence(5'-3')                              |
|-----------------|----------------------------------------------|
| BDNF-F          | TTATTTTCATACTTCGGTTGC                        |
| BDNF-R          | CACTCGCTAATGCTGTCTG                          |
| GAPDH-F         | CCAGTATGATTCCACCCACG                         |
| GAPDH-R         | ATTTGATGTTGGCGGGAT                           |
| Bcl-2-F         | CTCAGCAACCCAGCAAACAC                         |
| Bcl-2-R         | CTTGTTTTTCCACTGCGGGTG                        |
| p21-F           | CAGGACTGAGATGCACTGAT                         |
| p21-R           | ACACGTTCCCAGGCGAAGT                          |
| CCND1-F         | CACGACTTCATCGAGCACTT                         |
| CCND1-R         | GTTTGCGGATGATCTGTTTG                         |
| Bax-F           | TCTACCAAGAAGTTGAGCGAGTGT                     |
| Bax -R          | CATCCTCTGCAGCTCCATGTTA                       |
| Dicer 1-F       | CTAACGGCAGACTGGACG                           |
| Dicer 1-R       | GAAGGGAGCAAGAGCAAT                           |
| ssc-miR-127-RT  | GTCGTATCCAGTGCAGGGTCCGAGGTATTCGCACTGGATACGAC |
| ssc-miR-127-F   | TCGGATCCGTCTGAGCTTGGCT                       |
| ssc-miR-185-RT  | GTCGTATCCAGTGCAGGGTCCGAGGTATTCGCACTGGATACGAC |
| ssc-miR-185-F   | GGAGAGGTTGCGAGTTTCTGAT                       |
| ssc-miR-1273-RT | GTCGTATCCAGTGCAGGGTCCGAGGTATTCGCACTGGATACGAC |
| ssc-miR-1273-F  | AGACCACTGCAGCCTGGG                           |
| ssc-miR-7047-RT | GTCGTATCCAGTGCAGGGTCCGAGGTATTCGCACTGGATACGAC |
| ssc-miR-7047-F  | GGAGGGCTGGGTCTGTGC                           |
| ssc-miR-532-RT  | GTCGTATCCAGTGCAGGGTCCGAGGTATTCGCACTGGATACGAC |
| ssc-miR-532-F   | ACACTCCCTCCCACACCCAAGG                       |
| ssc-miR-R       | CAGTGCAGGGTCCGAGGTAT                         |
| U6 RT           | AACGCTTCACGAATTTGCGT                         |
| U6 F            | CTCGCTTCGGCAGCACA                            |
| U6 R            | AACGCTTCACGAATTTGCGT                         |
